# Supplementary material for: Geochemical Characteristics of Chlorite in Xiangshan Uranium Ore Field, South China and Its Exploration Implication
Source: MDPI journal article supplement (doi:10.3390/min12060693), 2022-05-30
Supplement: s1 [file s1]

Table S1. Electronic probe composition analysis (EPMA) data (wt %)

| Chlorite Type | Spot No.   | SiO <sub>2</sub> | MgO  | FeO   | Al <sub>2</sub> O <sub>3</sub> | Na <sub>2</sub> O | K <sub>2</sub> O | CaO  | Total | Na+K+Ca |
|---------------|------------|------------------|------|-------|--------------------------------|-------------------|------------------|------|-------|---------|
| Chl1-Y        | Y15-25-1   | 24.15            | 8.62 | 37.00 | 18.79                          | 0.03              | 0.11             | 0.04 | 88.73 | 0.18    |
|               | Y15-25-2   | 24.30            | 8.67 | 34.70 | 20.09                          | 0.01              | 0.01             | 0.33 | 88.12 | 0.36    |
|               | Y15-25-3   | 24.10            | 8.45 | 37.50 | 18.62                          | 0.02              | 0.05             | 0.34 | 89.08 | 0.41    |
|               | Y15-25-4   | 24.03            | 7.40 | 40.09 | 17.11                          | 0.02              | 0.06             | 0.25 | 88.97 | 0.33    |
|               | Y15-8-1    | 24.48            | 7.59 | 39.00 | 17.33                          | 0.02              | 0.06             | 0.38 | 88.85 | 0.45    |
|               | Y15-8-2    | 23.89            | 7.44 | 38.80 | 16.67                          | 0.01              | 0.04             | 0.32 | 87.18 | 0.37    |
|               | Y15-8-3    | 23.69            | 8.31 | 38.50 | 17.51                          | 0.02              | 0.21             | 0.10 | 88.33 | 0.33    |
|               | Y15-8-4    | 24.32            | 7.67 | 37.70 | 17.26                          | 0.01              | 0.09             | 0.30 | 87.36 | 0.40    |
|               | Y265-5-1   | 28.58            | 7.48 | 35.36 | 19.26                          | 0.02              | 0.02             | 0.09 | 90.81 | 0.13    |
|               | Y265-5-2   | 27.58            | 7.51 | 34.40 | 20.12                          | 0.02              | 0.02             | 0.08 | 89.73 | 0.12    |
|               | Y265-5-3   | 26.37            | 8.17 | 34.90 | 19.38                          | 0.02              | 0.02             | 0.07 | 88.92 | 0.11    |
|               | Y265-5-4   | 26.31            | 7.47 | 33.70 | 20.09                          | 0.02              | 0.01             | 0.09 | 87.68 | 0.12    |
|               | Y265-40-5  | 27.14            | 7.13 | 32.62 | 19.05                          | 0.02              | 0.02             | 0.10 | 86.09 | 0.15    |
|               | Y265-40-6  | 26.59            | 7.69 | 33.00 | 19.24                          | 0.02              | 0.02             | 0.09 | 86.65 | 0.13    |
|               | Y265-40-7  | 26.70            | 7.86 | 33.00 | 19.38                          | 0.02              | 0.01             | 0.07 | 87.04 | 0.10    |
| Chl1-Z        | Z15-166-1  | 25.90            | 5.44 | 38.44 | 18.72                          | 0.08              | 0.03             | 0.01 | 88.62 | 0.12    |
|               | Z15-166-2  | 25.14            | 5.23 | 38.02 | 18.47                          | 0.03              | 0.01             | 0.00 | 86.90 | 0.04    |
|               | Z15-166-3  | 25.31            | 5.14 | 39.20 | 18.37                          | 0.00              | 0.04             | 0.00 | 88.06 | 0.04    |
|               | Z15-128-1  | 25.49            | 5.65 | 34.53 | 20.55                          | 0.02              | 0.00             | 0.04 | 86.28 | 0.06    |
|               | Z15-128-2  | 25.18            | 4.84 | 35.12 | 19.84                          | 0.04              | 0.14             | 0.09 | 85.25 | 0.27    |
|               | Z15-128-3  | 24.71            | 3.82 | 37.24 | 19.96                          | 0.39              | 0.10             | 0.04 | 86.26 | 0.53    |
|               | Z15-128-4  | 25.50            | 5.93 | 34.84 | 20.22                          | 0.22              | 0.03             | 0.05 | 86.79 | 0.30    |
|               | 64-14-46-1 | 24.82            | 4.89 | 38.80 | 20.76                          | 0.02              | 0.01             | 0.03 | 89.32 | 0.06    |
|               | 64-14-46-2 | 23.85            | 4.33 | 40.80 | 19.08                          | 0.01              | 0.23             | 0.11 | 88.41 | 0.35    |

|      |            |       |       |       |       |      |      |      |       |      |
|------|------------|-------|-------|-------|-------|------|------|------|-------|------|
|      | 64-14-46-3 | 23.49 | 5.14  | 40.20 | 20.58 | 0.01 | 0.29 | 0.06 | 89.77 | 0.36 |
|      | 64-14-46-4 | 24.20 | 4.40  | 39.60 | 20.09 | 0.01 | 0.29 | 0.14 | 88.72 | 0.44 |
|      | 64-14-52-1 | 25.12 | 4.94  | 39.70 | 19.29 | 0.02 | 0.19 | 0.14 | 89.39 | 0.34 |
|      | 64-14-52-2 | 27.39 | 4.62  | 38.10 | 19.38 | 0.03 | 0.27 | 0.06 | 89.84 | 0.36 |
|      | 64-14-52-3 | 25.21 | 4.92  | 39.50 | 18.91 | 0.02 | 0.17 | 0.04 | 88.78 | 0.24 |
|      | 64-14-52-4 | 23.24 | 4.88  | 40.70 | 20.12 | 0.03 | 0.38 | 0.05 | 89.41 | 0.46 |
| Chl2 | Y15-4-1    | 27.87 | 13.24 | 29.63 | 17.61 | 0.04 | 0.02 | 0.41 | 88.82 | 0.47 |
|      | Y15-4-2    | 27.64 | 13.47 | 29.63 | 17.12 | 0.08 | 0.03 | 0.30 | 88.27 | 0.41 |
|      | Y15-4-3    | 27.25 | 12.96 | 30.09 | 17.87 | 0.05 | 0.03 | 0.15 | 88.40 | 0.23 |
|      | Y15-4-4    | 27.69 | 13.89 | 30.54 | 17.78 | 0.03 | 0.01 | 0.15 | 90.09 | 0.19 |
|      | Y15-4-5    | 28.99 | 15.73 | 22.53 | 19.07 | 0.00 | 0.00 | 0.16 | 86.48 | 0.16 |
|      | Y15-4-6    | 28.80 | 16.05 | 22.27 | 19.55 | 0.05 | 0.01 | 0.12 | 86.85 | 0.18 |
|      | Y15-16-1   | 28.73 | 13.78 | 25.75 | 18.50 | 0.04 | 0.16 | 0.16 | 87.12 | 0.36 |
|      | Y15-16-2   | 28.00 | 14.08 | 25.57 | 17.66 | 0.09 | 0.03 | 0.14 | 85.57 | 0.26 |
|      | Y15-16-4   | 28.17 | 14.38 | 24.99 | 19.36 | 0.06 | 0.02 | 0.13 | 87.11 | 0.21 |
|      | Y15-16-5   | 28.71 | 13.65 | 24.22 | 20.10 | 0.04 | 0.00 | 0.15 | 86.87 | 0.19 |
|      | Y15-16-6   | 28.15 | 13.72 | 24.56 | 19.51 | 0.01 | 0.02 | 0.20 | 86.17 | 0.23 |
|      | Y15-23-1   | 29.32 | 14.66 | 23.99 | 18.21 | 0.06 | 0.00 | 0.33 | 86.57 | 0.39 |
|      | Y15-23-2   | 28.93 | 14.41 | 24.33 | 18.71 | 0.06 | 0.00 | 0.24 | 86.68 | 0.30 |
|      | Y265-1-1   | 26.44 | 9.39  | 30.12 | 20.16 | 0.06 | 0.00 | 0.14 | 86.31 | 0.20 |
|      | Y265-1-2   | 26.37 | 9.38  | 29.64 | 20.07 | 0.06 | 0.00 | 0.15 | 85.67 | 0.21 |
|      | Y265-1-3   | 26.24 | 9.25  | 30.55 | 20.23 | 0.03 | 0.00 | 0.18 | 86.48 | 0.21 |
|      | Y265-1-4   | 26.69 | 10.10 | 31.39 | 20.28 | 0.01 | 0.00 | 0.05 | 88.52 | 0.06 |
|      | Y265-1-5   | 26.11 | 9.63  | 31.15 | 20.67 | 0.06 | 0.00 | 0.09 | 87.71 | 0.15 |
|      | Y265-46-1  | 30.48 | 13.96 | 22.58 | 20.20 | 0.01 | 0.21 | 0.11 | 87.55 | 0.33 |

|      |              |       |       |       |       |      |      |      |       |      |
|------|--------------|-------|-------|-------|-------|------|------|------|-------|------|
|      | Y265-46-2    | 29.87 | 13.71 | 24.08 | 20.05 | 0.04 | 0.17 | 0.16 | 88.08 | 0.37 |
|      | Y265-46-3    | 29.39 | 13.69 | 23.13 | 20.37 | 0.03 | 0.22 | 0.12 | 86.95 | 0.37 |
|      | Y15-10-1     | 29.90 | 14.70 | 23.35 | 18.72 | 0.00 | 0.03 | 0.18 | 86.88 | 0.21 |
|      | Y15-10-2     | 29.11 | 14.47 | 25.19 | 19.05 | 0.00 | 0.02 | 0.14 | 87.98 | 0.16 |
|      | Y15-10-3     | 28.43 | 14.85 | 23.94 | 19.26 | 0.01 | 0.00 | 0.16 | 86.65 | 0.17 |
|      | Y15-10-4     | 29.24 | 14.99 | 24.45 | 19.05 | 0.00 | 0.00 | 0.14 | 87.87 | 0.14 |
|      | Y265-31-1    | 28.95 | 11.81 | 26.52 | 20.20 | 0.12 | 0.04 | 0.17 | 87.81 | 0.33 |
|      | Y265-31-2    | 27.76 | 11.42 | 27.85 | 20.15 | 0.03 | 0.03 | 0.13 | 87.37 | 0.19 |
|      | Y265-31-3    | 29.59 | 10.41 | 26.03 | 20.48 | 0.22 | 0.00 | 0.16 | 86.89 | 0.38 |
|      | Y265-31-4    | 27.28 | 10.88 | 29.60 | 19.08 | 0.04 | 0.00 | 0.08 | 86.96 | 0.12 |
| Chl3 | Z15-56-1     | 25.28 | 5.82  | 38.37 | 19.69 | 0.00 | 0.09 | 0.27 | 89.52 | 0.36 |
|      | Z15-56-2     | 26.74 | 5.77  | 41.73 | 16.60 | 0.05 | 0.02 | 0.28 | 91.19 | 0.35 |
|      | Z15-136-1    | 26.26 | 6.04  | 41.82 | 17.67 | 0.10 | 0.14 | 0.15 | 92.18 | 0.39 |
|      | Z15-136-2    | 26.41 | 5.99  | 40.84 | 18.33 | 0.14 | 0.25 | 0.10 | 92.06 | 0.49 |
|      | Z15-136-3    | 25.20 | 5.53  | 37.44 | 18.36 | 0.11 | 0.05 | 0.30 | 86.99 | 0.46 |
|      | Z-170-4-1    | 23.60 | 2.86  | 43.26 | 19.28 | 0.05 | 0.03 | 0.10 | 89.18 | 0.18 |
|      | Z-170-4-2    | 25.94 | 3.62  | 44.58 | 17.51 | 0.00 | 0.00 | 0.11 | 91.76 | 0.11 |
|      | Z-170-4-3    | 25.41 | 3.68  | 43.95 | 18.24 | 0.00 | 0.14 | 0.06 | 91.48 | 0.20 |
|      | Z15-199-1    | 27.57 | 5.90  | 40.67 | 16.64 | 0.17 | 0.16 | 0.15 | 91.26 | 0.48 |
|      | Z15-199-2    | 27.12 | 6.23  | 41.53 | 15.43 | 0.11 | 0.07 | 0.29 | 90.78 | 0.47 |
|      | Z15-199-3    | 27.39 | 6.49  | 40.68 | 15.77 | 0.09 | 0.10 | 0.27 | 90.79 | 0.46 |
|      | Z15-207-2    | 27.15 | 8.75  | 34.56 | 19.00 | 0.00 | 0.05 | 0.14 | 89.65 | 0.19 |
|      | Z15-207-3    | 27.55 | 8.39  | 34.84 | 18.46 | 0.00 | 0.22 | 0.18 | 89.64 | 0.40 |
|      | ZK61-14-33-1 | 24.82 | 3.52  | 44.60 | 18.81 | 0.11 | 0.09 | 0.06 | 92.01 | 0.26 |
|      | ZK61-14-33-2 | 25.10 | 4.71  | 42.97 | 18.95 | 0.06 | 0.05 | 0.09 | 91.93 | 0.20 |

|              |       |      |       |       |      |      |      |       |      |
|--------------|-------|------|-------|-------|------|------|------|-------|------|
| ZK61-14-67-1 | 23.73 | 3.32 | 44.98 | 17.12 | 0.11 | 0.02 | 0.06 | 89.34 | 0.19 |
| ZK61-14-67-2 | 24.63 | 3.65 | 46.33 | 17.92 | 0.04 | 0.01 | 0.10 | 92.68 | 0.15 |
| ZK61-14-67-3 | 24.23 | 3.90 | 44.26 | 18.39 | 0.02 | 0.04 | 0.06 | 90.90 | 0.12 |
| ZK61-14-67-4 | 25.11 | 3.91 | 38.26 | 19.72 | 0.06 | 0.02 | 0.07 | 87.15 | 0.15 |
| ZK61-14-67-5 | 24.31 | 3.73 | 38.66 | 19.79 | 0.07 | 0.04 | 0.31 | 86.91 | 0.42 |
| ZK61-14-68-1 | 24.56 | 3.81 | 45.08 | 18.56 | 0.06 | 0.01 | 0.04 | 92.12 | 0.11 |
| ZK61-14-68-2 | 24.84 | 3.86 | 45.35 | 17.75 | 0.00 | 0.00 | 0.02 | 91.82 | 0.02 |
| Z-250-33-1   | 23.99 | 2.60 | 45.87 | 19.57 | 0.00 | 0.06 | 0.07 | 92.16 | 0.13 |
| Z-250-33-2   | 23.97 | 2.36 | 46.60 | 19.10 | 0.00 | 0.09 | 0.07 | 92.19 | 0.16 |
| Z-250-33-3   | 24.36 | 2.93 | 46.18 | 19.44 | 0.09 | 0.02 | 0.10 | 93.12 | 0.21 |
| Z-250-33-4   | 24.87 | 2.51 | 40.77 | 19.81 | 0.05 | 0.02 | 0.12 | 88.15 | 0.19 |
| Z-250-33-5   | 24.63 | 2.78 | 39.22 | 20.21 | 0.04 | 0.01 | 0.36 | 87.25 | 0.41 |
| Z-250-15-1   | 24.10 | 2.51 | 40.11 | 20.62 | 0.00 | 0.00 | 0.00 | 87.34 | 0.00 |
| Z-250-15-2   | 23.94 | 2.88 | 40.28 | 20.31 | 0.08 | 0.00 | 0.07 | 87.56 | 0.15 |
| Z-250-15-3   | 24.74 | 4.69 | 36.23 | 22.01 | 0.00 | 0.00 | 0.02 | 87.69 | 0.02 |
| Z-250-15-4   | 23.73 | 2.46 | 38.71 | 21.78 | 0.02 | 0.00 | 0.07 | 86.77 | 0.09 |
| Z15-254-2    | 25.54 | 4.77 | 38.26 | 19.37 | 0.06 | 0.02 | 0.04 | 88.06 | 0.12 |
| Z15-254-3    | 26.52 | 5.49 | 36.89 | 18.87 | 0.00 | 0.03 | 0.09 | 87.89 | 0.12 |

The major element data of Chl2 are from Wang et al. (2018)

Table S2. Calculated cation numbers of chlorites and recalculated temperatures of Xiangshan chlorite (at standard of 14 oxygen atoms)

| Chlorite Type | No.      | Si   | Mg   | Fe   | Al   | Na   | K    | Ca   | Al <sup>IV</sup> | Al <sup>VI</sup> | Fe/(Fe+Mg) | Fe+Al <sup>VI</sup> | d001(0.1nm) | t <sub>d001</sub> (°C) |
|---------------|----------|------|------|------|------|------|------|------|------------------|------------------|------------|---------------------|-------------|------------------------|
| Chl1-Y        | Y15-25-1 | 2.69 | 1.43 | 3.45 | 2.47 | 0.01 | 0.02 | 0.00 | 1.305            | 1.167            | 0.707      | 4.62                | 14.120      | 259.5                  |
|               | Y15-25-2 | 2.69 | 1.43 | 3.21 | 2.62 | 0.00 | 0.00 | 0.04 | 1.310            | 1.312            | 0.692      | 4.53                | 14.124      | 255.2                  |

|        |            |      |      |      |      |      |      |      |       |       |       |      |        |       |
|--------|------------|------|------|------|------|------|------|------|-------|-------|-------|------|--------|-------|
|        | Y15-25-3   | 2.69 | 1.40 | 3.50 | 2.45 | 0.01 | 0.01 | 0.04 | 1.312 | 1.137 | 0.714 | 4.64 | 14.118 | 261.2 |
|        | Y15-25-4   | 2.73 | 1.25 | 3.81 | 2.29 | 0.00 | 0.01 | 0.03 | 1.269 | 1.023 | 0.752 | 4.83 | 14.116 | 262.5 |
|        | Y15-8-1    | 2.76 | 1.28 | 3.68 | 2.31 | 0.00 | 0.01 | 0.05 | 1.236 | 1.071 | 0.743 | 4.75 | 14.123 | 256.1 |
|        | Y15-8-2    | 2.76 | 1.28 | 3.75 | 2.27 | 0.00 | 0.01 | 0.04 | 1.240 | 1.031 | 0.745 | 4.78 | 14.121 | 257.9 |
|        | Y15-8-3    | 2.69 | 1.41 | 3.66 | 2.34 | 0.00 | 0.03 | 0.01 | 1.307 | 1.038 | 0.722 | 4.70 | 14.115 | 263.9 |
|        | Y15-8-4    | 2.78 | 1.31 | 3.60 | 2.32 | 0.00 | 0.01 | 0.04 | 1.221 | 1.103 | 0.734 | 4.71 | 14.126 | 252.8 |
|        | Y265-5-1   | 3.03 | 1.18 | 3.13 | 2.41 | 0.00 | 0.00 | 0.01 | 0.970 | 1.436 | 0.726 | 4.57 | 14.164 | 214.6 |
|        | Y265-5-2   | 2.95 | 1.20 | 3.08 | 2.54 | 0.00 | 0.00 | 0.01 | 1.048 | 1.489 | 0.720 | 4.57 | 14.157 | 222.4 |
|        | Y265-5-3   | 2.87 | 1.33 | 3.18 | 2.49 | 0.00 | 0.00 | 0.01 | 1.127 | 1.362 | 0.705 | 4.54 | 14.146 | 233.5 |
|        | Y265-5-4   | 2.89 | 1.22 | 3.09 | 2.60 | 0.00 | 0.00 | 0.01 | 1.113 | 1.486 | 0.717 | 4.58 | 14.149 | 230.1 |
|        | Y265-40-5  | 3.02 | 1.18 | 3.03 | 2.49 | 0.00 | 0.00 | 0.01 | 0.985 | 1.509 | 0.719 | 4.54 | 14.165 | 214.1 |
|        | Y265-40-6  | 2.95 | 1.27 | 3.06 | 2.51 | 0.00 | 0.00 | 0.01 | 1.054 | 1.457 | 0.707 | 4.51 | 14.156 | 222.7 |
|        | Y265-40-7  | 2.94 | 1.29 | 3.04 | 2.52 | 0.00 | 0.00 | 0.01 | 1.058 | 1.458 | 0.702 | 4.50 | 14.156 | 222.8 |
| Chl1-Z | Z15-166-1  | 2.89 | 0.91 | 3.59 | 2.47 | 0.02 | 0.00 | 0.00 | 1.105 | 1.361 | 0.799 | 4.95 | 14.140 | 239.3 |
|        | Z15-166-2  | 2.87 | 0.89 | 3.63 | 2.49 | 0.01 | 0.00 | 0.00 | 1.128 | 1.358 | 0.803 | 4.99 | 14.136 | 242.8 |
|        | Z15-166-3  | 2.87 | 0.87 | 3.71 | 2.45 | 0.00 | 0.01 | 0.00 | 1.132 | 1.321 | 0.811 | 5.03 | 14.134 | 244.9 |
|        | Z15-128-1  | 2.86 | 0.95 | 3.24 | 2.72 | 0.00 | 0.00 | 0.00 | 1.138 | 1.582 | 0.774 | 4.82 | 14.143 | 236.0 |
|        | Z15-128-2  | 2.88 | 0.83 | 3.36 | 2.68 | 0.01 | 0.02 | 0.01 | 1.116 | 1.562 | 0.803 | 4.93 | 14.143 | 236.0 |
|        | Z15-128-3  | 2.83 | 0.65 | 3.57 | 2.70 | 0.09 | 0.01 | 0.00 | 1.165 | 1.534 | 0.845 | 5.11 | 14.133 | 245.8 |
|        | Z15-128-4  | 2.86 | 0.99 | 3.26 | 2.67 | 0.05 | 0.00 | 0.01 | 1.144 | 1.525 | 0.767 | 4.79 | 14.142 | 237.2 |
|        | 64-14-46-1 | 2.75 | 0.81 | 3.60 | 2.72 | 0.00 | 0.00 | 0.00 | 1.245 | 1.470 | 0.817 | 5.07 | 14.123 | 255.6 |
|        | 64-14-46-2 | 2.73 | 0.74 | 3.91 | 2.57 | 0.00 | 0.03 | 0.01 | 1.269 | 1.305 | 0.841 | 5.21 | 14.115 | 264.5 |
|        | 64-14-46-3 | 2.63 | 0.86 | 3.77 | 2.72 | 0.00 | 0.04 | 0.01 | 1.367 | 1.351 | 0.814 | 5.12 | 14.106 | 273.0 |
|        | 64-14-46-4 | 2.73 | 0.74 | 3.74 | 2.67 | 0.00 | 0.04 | 0.02 | 1.266 | 1.408 | 0.835 | 5.15 | 14.118 | 260.8 |
|        | 64-14-52-1 | 2.81 | 0.82 | 3.71 | 2.54 | 0.00 | 0.03 | 0.02 | 1.191 | 1.352 | 0.818 | 5.06 | 14.127 | 251.6 |
|        | 64-14-52-2 | 2.99 | 0.75 | 3.48 | 2.50 | 0.01 | 0.04 | 0.01 | 1.005 | 1.492 | 0.822 | 4.98 | 14.153 | 225.6 |

|      |            |      |      |      |      |      |      |      |       |       |       |      |        |       |
|------|------------|------|------|------|------|------|------|------|-------|-------|-------|------|--------|-------|
|      | 64-14-52-3 | 2.84 | 0.83 | 3.72 | 2.51 | 0.00 | 0.03 | 0.01 | 1.163 | 1.345 | 0.818 | 5.06 | 14.131 | 248.5 |
|      | 64-14-52-4 | 2.63 | 0.82 | 3.85 | 2.68 | 0.01 | 0.06 | 0.01 | 1.370 | 1.314 | 0.824 | 5.17 | 14.104 | 274.9 |
| Chl2 | Y15-4-1    | 2.96 | 2.10 | 2.63 | 2.20 | 0.01 | 0.00 | 0.05 | 1.041 | 1.162 | 0.557 | 3.79 | 14.166 | 212.6 |
|      | Y15-4-2    | 2.96 | 2.15 | 2.65 | 2.16 | 0.02 | 0.00 | 0.03 | 1.042 | 1.117 | 0.552 | 3.77 | 14.166 | 213.1 |
|      | Y15-4-3    | 2.92 | 2.07 | 2.69 | 2.25 | 0.01 | 0.00 | 0.02 | 1.083 | 1.171 | 0.566 | 3.86 | 14.160 | 218.7 |
|      | Y15-4-4    | 2.91 | 2.18 | 2.68 | 2.20 | 0.01 | 0.00 | 0.02 | 1.091 | 1.111 | 0.552 | 3.79 | 14.160 | 219.4 |
|      | Y15-4-5    | 3.03 | 2.45 | 1.97 | 2.35 | 0.00 | 0.00 | 0.02 | 0.975 | 1.371 | 0.446 | 3.34 | 14.187 | 191.6 |
|      | Y15-4-6    | 2.99 | 2.48 | 1.93 | 2.39 | 0.01 | 0.00 | 0.01 | 1.011 | 1.380 | 0.438 | 3.31 | 14.184 | 195.1 |
|      | Y15-16-1   | 3.03 | 2.17 | 2.27 | 2.30 | 0.01 | 0.02 | 0.02 | 0.966 | 1.337 | 0.512 | 3.61 | 14.182 | 196.8 |
|      | Y15-16-2   | 3.02 | 2.26 | 2.31 | 2.24 | 0.02 | 0.00 | 0.02 | 0.981 | 1.263 | 0.505 | 3.57 | 14.180 | 199.2 |
|      | Y15-16-4   | 2.96 | 2.25 | 2.20 | 2.40 | 0.01 | 0.00 | 0.01 | 1.037 | 1.363 | 0.494 | 3.56 | 14.176 | 203.5 |
|      | Y15-16-5   | 3.01 | 2.13 | 2.12 | 2.48 | 0.01 | 0.00 | 0.02 | 0.995 | 1.484 | 0.499 | 3.60 | 14.182 | 197.0 |
|      | Y15-16-6   | 2.99 | 2.17 | 2.18 | 2.44 | 0.00 | 0.00 | 0.02 | 1.015 | 1.424 | 0.501 | 3.60 | 14.179 | 200.5 |
|      | Y15-23-1   | 3.08 | 2.30 | 2.11 | 2.26 | 0.01 | 0.00 | 0.04 | 0.917 | 1.339 | 0.479 | 3.45 | 14.191 | 187.9 |
|      | Y15-23-2   | 3.04 | 2.26 | 2.14 | 2.32 | 0.01 | 0.00 | 0.03 | 0.957 | 1.363 | 0.486 | 3.50 | 14.186 | 193.0 |
|      | Y265-1-1   | 2.89 | 1.53 | 2.76 | 2.60 | 0.01 | 0.00 | 0.02 | 1.106 | 1.494 | 0.643 | 4.25 | 14.156 | 222.6 |
|      | Y265-1-2   | 2.90 | 1.54 | 2.73 | 2.60 | 0.01 | 0.00 | 0.02 | 1.098 | 1.505 | 0.639 | 4.23 | 14.158 | 221.1 |
|      | Y265-1-3   | 2.87 | 1.51 | 2.80 | 2.61 | 0.01 | 0.00 | 0.02 | 1.126 | 1.486 | 0.649 | 4.28 | 14.153 | 225.7 |
|      | Y265-1-4   | 2.86 | 1.61 | 2.81 | 2.56 | 0.00 | 0.00 | 0.01 | 1.139 | 1.423 | 0.636 | 4.24 | 14.151 | 227.5 |
|      | Y265-1-5   | 2.83 | 1.55 | 2.82 | 2.64 | 0.01 | 0.00 | 0.01 | 1.173 | 1.464 | 0.645 | 4.28 | 14.147 | 231.6 |
|      | Y265-46-1  | 3.12 | 2.13 | 1.93 | 2.44 | 0.00 | 0.03 | 0.01 | 0.877 | 1.563 | 0.476 | 3.50 | 14.199 | 179.7 |
|      | Y265-46-2  | 3.07 | 2.10 | 2.07 | 2.43 | 0.01 | 0.02 | 0.02 | 0.927 | 1.504 | 0.496 | 3.58 | 14.191 | 188.2 |
|      | Y265-46-3  | 3.05 | 2.12 | 2.01 | 2.49 | 0.01 | 0.03 | 0.01 | 0.949 | 1.544 | 0.487 | 3.55 | 14.190 | 189.5 |
|      | Y15-10-1   | 3.11 | 2.28 | 2.03 | 2.30 | 0.00 | 0.00 | 0.02 | 0.889 | 1.407 | 0.471 | 3.44 | 14.196 | 183.1 |
|      | Y15-10-2   | 3.03 | 2.24 | 2.19 | 2.33 | 0.00 | 0.00 | 0.02 | 0.974 | 1.359 | 0.494 | 3.55 | 14.183 | 196.1 |

|      |              |      |      |      |      |      |      |      |       |       |       |      |        |       |
|------|--------------|------|------|------|------|------|------|------|-------|-------|-------|------|--------|-------|
|      | Y15-10-3     | 2.99 | 2.33 | 2.10 | 2.38 | 0.00 | 0.00 | 0.02 | 1.013 | 1.372 | 0.475 | 3.48 | 14.180 | 198.8 |
|      | Y15-10-4     | 3.03 | 2.32 | 2.12 | 2.33 | 0.00 | 0.00 | 0.02 | 0.970 | 1.357 | 0.478 | 3.48 | 14.185 | 194.1 |
|      | Y265-31-1    | 3.03 | 1.84 | 2.32 | 2.49 | 0.02 | 0.01 | 0.02 | 0.969 | 1.524 | 0.557 | 3.85 | 14.181 | 198.1 |
|      | Y265-31-2    | 2.95 | 1.81 | 2.48 | 2.53 | 0.01 | 0.00 | 0.01 | 1.048 | 1.478 | 0.578 | 3.95 | 14.169 | 210.3 |
|      | Y265-31-3    | 3.11 | 1.63 | 2.29 | 2.54 | 0.04 | 0.00 | 0.02 | 0.887 | 1.653 | 0.584 | 3.94 | 14.191 | 188.0 |
|      | Y265-31-4    | 2.95 | 1.75 | 2.68 | 2.43 | 0.01 | 0.00 | 0.01 | 1.048 | 1.385 | 0.604 | 4.06 | 14.165 | 214.4 |
| Chl3 | Z15-56-1     | 2.80 | 0.96 | 3.55 | 2.57 | 0.00 | 0.01 | 0.03 | 1.202 | 1.367 | 0.787 | 4.92 | 14.129 | 249.6 |
|      | Z15-56-2     | 2.95 | 0.95 | 3.86 | 2.16 | 0.01 | 0.00 | 0.03 | 1.045 | 1.117 | 0.802 | 4.97 | 14.141 | 237.7 |
|      | Z15-136-1    | 2.87 | 0.98 | 3.82 | 2.28 | 0.02 | 0.02 | 0.02 | 1.130 | 1.147 | 0.795 | 4.97 | 14.132 | 246.7 |
|      | Z15-136-2    | 2.87 | 0.97 | 3.71 | 2.35 | 0.03 | 0.03 | 0.01 | 1.127 | 1.222 | 0.793 | 4.94 | 14.135 | 244.3 |
|      | Z15-136-3    | 2.87 | 0.94 | 3.57 | 2.47 | 0.02 | 0.01 | 0.04 | 1.129 | 1.337 | 0.792 | 4.90 | 14.137 | 241.5 |
|      | Z-170-4-1    | 2.71 | 0.49 | 4.15 | 2.61 | 0.01 | 0.00 | 0.01 | 1.290 | 1.320 | 0.895 | 5.48 | 14.107 | 271.8 |
|      | Z-170-4-2    | 2.89 | 0.60 | 4.15 | 2.30 | 0.00 | 0.00 | 0.01 | 1.109 | 1.190 | 0.874 | 5.34 | 14.128 | 251.1 |
|      | Z-170-4-3    | 2.84 | 0.61 | 4.10 | 2.40 | 0.00 | 0.02 | 0.01 | 1.165 | 1.234 | 0.870 | 5.34 | 14.123 | 256.4 |
|      | Z15-199-1    | 3.02 | 0.96 | 3.73 | 2.15 | 0.04 | 0.02 | 0.02 | 0.980 | 1.169 | 0.795 | 4.89 | 14.151 | 227.6 |
|      | Z15-199-2    | 3.01 | 1.03 | 3.86 | 2.02 | 0.02 | 0.01 | 0.03 | 0.987 | 1.034 | 0.789 | 4.89 | 14.148 | 231.0 |
|      | Z15-199-3    | 3.02 | 1.07 | 3.76 | 2.05 | 0.02 | 0.01 | 0.03 | 0.976 | 1.076 | 0.779 | 4.83 | 14.151 | 227.7 |
|      | Z15-207-2    | 2.92 | 1.40 | 3.11 | 2.41 | 0.00 | 0.01 | 0.02 | 1.077 | 1.335 | 0.689 | 4.45 | 14.153 | 226.4 |
|      | Z15-207-3    | 2.97 | 1.35 | 3.14 | 2.35 | 0.00 | 0.03 | 0.02 | 1.026 | 1.322 | 0.700 | 4.47 | 14.158 | 221.3 |
|      | ZK61-14-33-1 | 2.77 | 0.58 | 4.16 | 2.47 | 0.02 | 0.01 | 0.01 | 1.235 | 1.235 | 0.877 | 5.39 | 14.113 | 265.5 |
|      | ZK61-14-33-2 | 2.77 | 0.77 | 3.97 | 2.47 | 0.01 | 0.01 | 0.01 | 1.230 | 1.235 | 0.837 | 5.20 | 14.118 | 261.1 |
|      | ZK61-14-67-1 | 2.76 | 0.58 | 4.37 | 2.34 | 0.02 | 0.00 | 0.01 | 1.242 | 1.102 | 0.884 | 5.47 | 14.108 | 270.7 |
|      | ZK61-14-67-2 | 2.75 | 0.61 | 4.33 | 2.36 | 0.01 | 0.00 | 0.01 | 1.248 | 1.113 | 0.877 | 5.44 | 14.108 | 270.5 |
|      | ZK61-14-67-3 | 2.74 | 0.66 | 4.18 | 2.45 | 0.00 | 0.01 | 0.01 | 1.262 | 1.187 | 0.864 | 5.37 | 14.110 | 269.2 |
|      | ZK61-14-67-4 | 2.86 | 0.66 | 3.64 | 2.64 | 0.01 | 0.00 | 0.01 | 1.143 | 1.501 | 0.846 | 5.14 | 14.134 | 244.6 |

|              |      |      |      |      |      |      |      |       |       |       |      |        |       |
|--------------|------|------|------|------|------|------|------|-------|-------|-------|------|--------|-------|
| ZK61-14-67-5 | 2.79 | 0.64 | 3.71 | 2.68 | 0.02 | 0.01 | 0.04 | 1.209 | 1.470 | 0.853 | 5.18 | 14.125 | 253.6 |
| ZK61-14-68-1 | 2.74 | 0.63 | 4.21 | 2.44 | 0.01 | 0.00 | 0.00 | 1.258 | 1.183 | 0.869 | 5.39 | 14.110 | 269.3 |
| ZK61-14-68-2 | 2.79 | 0.65 | 4.26 | 2.35 | 0.00 | 0.00 | 0.00 | 1.213 | 1.135 | 0.868 | 5.39 | 14.114 | 265.0 |
| Z-250-33-1   | 2.69 | 0.43 | 4.30 | 2.58 | 0.00 | 0.01 | 0.01 | 1.312 | 1.273 | 0.908 | 5.57 | 14.102 | 277.2 |
| Z-250-33-2   | 2.70 | 0.40 | 4.39 | 2.53 | 0.00 | 0.01 | 0.01 | 1.301 | 1.234 | 0.917 | 5.62 | 14.101 | 277.8 |
| Z-250-33-3   | 2.70 | 0.48 | 4.28 | 2.54 | 0.02 | 0.00 | 0.01 | 1.299 | 1.241 | 0.898 | 5.52 | 14.104 | 275.5 |
| Z-250-33-4   | 2.84 | 0.43 | 3.89 | 2.66 | 0.01 | 0.00 | 0.01 | 1.164 | 1.498 | 0.901 | 5.39 | 14.127 | 252.0 |
| Z-250-33-5   | 2.82 | 0.47 | 3.75 | 2.73 | 0.01 | 0.00 | 0.04 | 1.182 | 1.543 | 0.888 | 5.30 | 14.128 | 251.4 |
| Z-250-15-1   | 2.77 | 0.43 | 3.85 | 2.79 | 0.00 | 0.00 | 0.00 | 1.233 | 1.557 | 0.900 | 5.41 | 14.120 | 259.2 |
| Z-250-15-2   | 2.75 | 0.49 | 3.87 | 2.75 | 0.02 | 0.00 | 0.01 | 1.251 | 1.498 | 0.887 | 5.37 | 14.117 | 261.6 |
| Z-250-15-3   | 2.76 | 0.78 | 3.37 | 2.89 | 0.00 | 0.00 | 0.00 | 1.245 | 1.644 | 0.813 | 5.02 | 14.128 | 251.0 |
| Z-250-15-4   | 2.72 | 0.42 | 3.71 | 2.94 | 0.00 | 0.00 | 0.01 | 1.279 | 1.664 | 0.898 | 5.38 | 14.117 | 261.7 |
| Z15-254-2    | 2.87 | 0.80 | 3.60 | 2.57 | 0.01 | 0.00 | 0.00 | 1.129 | 1.437 | 0.818 | 5.03 | 14.137 | 242.1 |
| Z15-254-3    | 2.96 | 0.91 | 3.44 | 2.48 | 0.00 | 0.00 | 0.01 | 1.043 | 1.437 | 0.790 | 4.88 | 14.150 | 229.1 |

Table S3. LA-ICP-MS trace elements data of chlorite at Xiangshan (ppm)

| No.      | Ti   | Mn    | Sc   | V    | Cr   | Co   | Ni   | Zn  | Ga   | Rb   | Sr   | La   | Ce   | Pr   |
|----------|------|-------|------|------|------|------|------|-----|------|------|------|------|------|------|
| Y15-25-1 | 2071 | 12102 | 46.3 | 171  | 46.6 | 43.2 | 44.4 | 839 | 74.3 | 20.9 | 26.9 | 31.4 | 47.2 | 5.66 |
| Y15-25-2 | 979  | 13360 | 10.4 | 135  | 45.7 | 44.7 | 47.0 | 882 | 81.7 | 1.01 | 10.5 | 3.11 | 3.83 | 0.71 |
| Y15-25-3 | 1600 | 11498 | 32.5 | 180  | 19.4 | 46.5 | 47.3 | 792 | 72.7 | 2.83 | 12.3 | 5.81 | 9.53 | 1.70 |
| Y15-25-4 | 919  | 10562 | 47.8 | 216  | 19.4 | 40.5 | 38.9 | 658 | 63.7 | 2.21 | 18.6 | 7.24 | 9.67 | 1.78 |
| Y15-25-5 | 884  | 10628 | 52.8 | 214  | 15.5 | 41.8 | 40.6 | 662 | 66.1 | 9.35 | 14.9 | 8.46 | 14.2 | 2.14 |
| Y15-25-6 | 816  | 13843 | 63.7 | 105  | 24.1 | 36.4 | 36.0 | 880 | 71.0 | 2.90 | 12.5 | 5.85 | 7.11 | 1.49 |
| Y15-25-7 | 770  | 15274 | 24.0 | 89.7 | 12.8 | 40.6 | 39.5 | 985 | 83.4 | 18.2 | 17.0 | 3.95 | 5.03 | 0.93 |
| Y15-25-8 | 1496 | 14098 | 50.2 | 113  | 16.5 | 42.5 | 34.2 | 936 | 84.3 | 8.94 | 31.6 | 74.7 | 158  | 16.8 |
| Y265-5-1 | 389  | 8392  | 12.9 | 219  | 120  | 44.6 | 31.9 | 696 | 65.8 | 220  | 22.4 | 6.52 | 22.1 | 2.74 |



|            |      |       |      |      |      |      |      |      |      |      |      |       |       |        |
|------------|------|-------|------|------|------|------|------|------|------|------|------|-------|-------|--------|
| Y265-5-2   | 273  | 8780  | 11.4 | 211  | 127  | 46.3 | 34.1 | 720  | 67.7 | 188  | 21.4 | 3.93  | 15.5  | 1.85   |
| Y265-5-3   | 932  | 9549  | 10.8 | 195  | 152  | 47.3 | 36.4 | 732  | 69.6 | 198  | 22.8 | 5.48  | 18.9  | 2.12   |
| Y265-5-4   | 826  | 8769  | 10.1 | 202  | 138  | 48.4 | 34.6 | 772  | 68.0 | 160  | 20.6 | 2.79  | 11.8  | 1.39   |
| Y265-5-5   | 655  | 7763  | 15.3 | 240  | 186  | 43.8 | 35.1 | 676  | 64.9 | 241  | 25.9 | 7.81  | 32.3  | 3.63   |
| Y265-5-6   | 618  | 8802  | 16.0 | 279  | 167  | 45.0 | 29.4 | 719  | 72.6 | 244  | 22.8 | 4.57  | 20.0  | 2.29   |
| Y265-5-7   | 1678 | 9578  | 7.88 | 173  | 75.5 | 49.7 | 31.1 | 747  | 64.1 | 130  | 19.0 | 1.48  | 6.51  | 0.84   |
| 64-14-46-1 | 560  | 7231  | 28.0 | 46.2 | 3.90 | 35.2 | 40.3 | 1054 | 103  | 200  | 10.6 | 5.78  | 11.8  | 1.22   |
| 64-14-46-2 | 1133 | 13387 | 56.5 | 41.8 | 5.90 | 30.6 | 37.8 | 890  | 92.1 | 112  | 36.3 | 11.8  | 20.9  | 2.22   |
| 64-14-46-3 | 714  | 9678  | 23.2 | 57.0 | 6.79 | 35.0 | 41.4 | 1035 | 96.7 | 56.4 | 6.06 | 6.14  | 16.2  | 1.60   |
| 64-14-46-4 | 796  | 9842  | 36.1 | 47.5 | 4.51 | 32.4 | 34.7 | 889  | 91.3 | 185  | 26.0 | 9.68  | 23.3  | 2.66   |
| 64-14-52-1 | 2102 | 15084 | 22.0 | 49.9 | 5.85 | 32.9 | 36.9 | 1008 | 118  | 153  | 16.9 | 8.57  | 22.5  | 2.55   |
| 64-14-52-2 | 866  | 12952 | 20.4 | 46.3 | 8.34 | 32.5 | 30.9 | 961  | 106  | 138  | 9.54 | 0.81  | 3.66  | 0.56   |
| 64-14-52-3 | 1414 | 22781 | 54.2 | 68.2 | 13.7 | 37.6 | 32.9 | 880  | 111  | 152  | 18.1 | 13.8  | 34.6  | 4.18   |
| 64-14-52-4 | 545  | 17876 | 39.2 | 42.0 | 8.82 | 37.9 | 30.5 | 966  | 114  | 98.5 | 37.6 | 30.0  | 51.0  | 3.59   |
| Y15-4-1    | 620  | 3418  | 19.9 | 150  | 184  | 45.4 | 217  | 1145 | 84.2 | 3.83 | 15.8 | 0.43  | 0.41  | 0.085  |
| Y15-4-2    | 496  | 2784  | 15.3 | 158  | 132  | 49.4 | 236  | 1194 | 84.2 | 2.86 | 12.9 | 0.27  | 0.25  | 0.056  |
| Y15-4-4    | 361  | 2851  | 16.1 | 159  | 119  | 50.4 | 231  | 1220 | 84.9 | 3.25 | 11.7 | 0.066 | 0.073 | 0.020  |
| Y15-4-5    | 565  | 3552  | 19.5 | 141  | 69.6 | 37.2 | 159  | 980  | 76.4 | 5.08 | 44.8 | 1.16  | 2.37  | 0.33   |
| Y15-4-6    | 157  | 2799  | 16.4 | 156  | 137  | 47.0 | 232  | 1125 | 82.1 | 3.94 | 12.1 | 0.035 | 0.038 | 0.0075 |
| Y15-16-1   | 172  | 2802  | 15.4 | 150  | 116  | 44.9 | 206  | 1121 | 84.2 | 3.43 | 10.5 | 0.047 | 0.046 | 0.013  |
| Y15-16-2   | 210  | 2890  | 15.5 | 146  | 116  | 39.9 | 180  | 1073 | 80.4 | 5.14 | 11.8 | 0.052 | 0.041 | 0.016  |
| Y15-16-3   | 183  | 3657  | 12.8 | 153  | 99.2 | 43.5 | 205  | 1146 | 81.6 | 2.48 | 7.61 | 0.033 | 0.057 | 0.016  |
| Y15-16-4   | 141  | 3466  | 13.7 | 145  | 149  | 40.6 | 195  | 1090 | 82.1 | 3.00 | 8.11 | 0.054 | 0.10  | 0.0061 |
| Y15-16-5   | 154  | 3672  | 14.3 | 146  | 133  | 42.5 | 192  | 1073 | 80.8 | 2.51 | 7.40 | 0.049 | 0.075 | 0.015  |
| Y15-23-1   | 195  | 2990  | 16.2 | 159  | 139  | 47.3 | 222  | 1148 | 84.1 | 2.81 | 7.67 | 0.044 | 0.069 | 0.016  |
| Y15-23-2   | 131  | 4510  | 15.1 | 135  | 150  | 33.5 | 139  | 985  | 77.3 | 1.51 | 7.08 | 0.61  | 0.10  | 0.0060 |

|              |      |      |      |      |       |       |      |      |      |       |       |        |        |       |
|--------------|------|------|------|------|-------|-------|------|------|------|-------|-------|--------|--------|-------|
| Y15-23-3     | 237  | 3555 | 15.5 | 160  | 129   | 43.4  | 210  | 1102 | 86.5 | 2.49  | 11.8  | 0.12   | 0.15   | 0.021 |
| Y15-23-4     | 108  | 3935 | 19.5 | 139  | 94.2  | 33.3  | 130  | 931  | 78.1 | 4.29  | 17.3  | 0.099  | 0.058  | 0.026 |
| Y15-23-5     | 150  | 3051 | 17.5 | 169  | 180   | 44.0  | 202  | 1124 | 87.8 | 4.01  | 16.8  | 0.12   | 0.076  | 0.031 |
| Y265-1-1     | 123  | 4321 | 22.3 | 314  | 96.1  | 26.5  | 144  | 1116 | 120  | 0.36  | 7.76  | 0.35   | 0.67   | 0.052 |
| Y265-1-2     | 122  | 3240 | 20.4 | 310  | 82.2  | 26.1  | 147  | 1080 | 126  | 0.33  | 8.22  | 0.31   | 0.52   | 0.048 |
| Y265-1-3     | 119  | 3756 | 20.1 | 302  | 72.3  | 27.1  | 149  | 1067 | 128  | 0.42  | 7.92  | 0.25   | 0.53   | 0.057 |
| Y265-1-4     | 142  | 5789 | 28.9 | 297  | 63.0  | 24.7  | 128  | 1074 | 119  | 0.22  | 7.31  | 0.37   | 1.08   | 0.11  |
| Y265-1-5     | 105  | 3815 | 19.0 | 280  | 62.0  | 23.9  | 141  | 971  | 116  | 0.40  | 6.94  | 0.24   | 0.43   | 0.039 |
| Y265-1-6     | 113  | 4052 | 19.2 | 285  | 69.2  | 24.6  | 142  | 1003 | 120  | 0.30  | 9.41  | 0.50   | 1.43   | 0.16  |
| ZK61-14-67-1 | 435  | 4813 | 10.7 | 63   | 4.6   | 18.9  | 28.9 | 291  | 32   | 25.08 | 39.65 | 2.56   | 7.61   | 0.868 |
| ZK61-14-67-2 | 281  | 4451 | 10.2 | 67   | 44.3  | 13.3  | 18.5 | 291  | 29   | 15.60 | 7.19  | 0.37   | 1.21   | 0.140 |
| ZK61-14-67-3 | 521  | 5366 | 10.8 | 69   | 13.3  | 28.8  | 48.9 | 361  | 31   | 23.55 | 21.20 | 2.74   | 8.24   | 0.919 |
| ZK61-14-67-4 | 401  | 3981 | 12.0 | 74   | 27.5  | 21.6  | 34.2 | 294  | 30   | 42.28 | 17.28 | 1.85   | 5.63   | 0.65  |
| ZK61-14-68-1 | 255  | 4429 | 10.3 | 71   | 37.8  | 25.5  | 39.2 | 321  | 30   | 11.92 | 11.31 | 0.76   | 2.07   | 0.224 |
| ZK61-14-68-2 | 356  | 4397 | 11.5 | 66   | 41.6  | 24.1  | 38.9 | 279  | 31   | 11.52 | 14.71 | 1.45   | 4.07   | 0.44  |
| ZK61-14-68-3 | 245  | 4233 | 10.8 | 65   | 13.6  | 10.3  | 16.0 | 280  | 30   | 9.56  | 8.90  | 0.55   | 1.59   | 0.19  |
| ZK61-14-68-4 | 279  | 5108 | 9.8  | 64   | 43.1  | 10.7  | 22.0 | 304  | 32   | 10.77 | 9.05  | 0.69   | 2.13   | 0.238 |
| Z-250-33-1   | 210  | 6200 | 22.9 | 109  | 5.0   | 11.25 | 64.7 | 1054 | 31   | 1.88  | 7.36  | 0.17   | 0.33   | 0.049 |
| Z-250-33-2   | 216  | 7389 | 15.6 | 108  | 32.4  | 11.30 | 55.0 | 1070 | 30   | 2.44  | 10.27 | 0.37   | 1.28   | 0.123 |
| Z-250-33-3   | 243  | 6831 | 27.9 | 120  | 9.8   | 12.29 | 82.9 | 1071 | 28   | 1.34  | 5.33  | 0.09   | 0.52   | 0.096 |
| Z-250-15-1   | 550  | 3567 | 16.1 | 131  | 136.0 | 20.6  | 28.9 | 1161 | 67   | 0.18  | 18.48 | 1.19   | 2.46   | 0.300 |
| Z-250-15-2   | 140  | 3276 | 15.0 | 131  | 188.0 | 20.8  | 48.9 | 1176 | 68   | 0.39  | 20.33 | 1.17   | 2.50   | 0.255 |
| No.          | Nd   | Sm   | Eu   | Gd   | Tb    | Dy    | Ho   | Er   | Tm   | Yb    | Lu    | Pb     | Th     | U     |
| Y15-25-1     | 23.1 | 6.14 | 0.72 | 7.41 | 1.06  | 6.12  | 1.32 | 3.28 | 0.39 | 2.31  | 0.38  | 63.842 | 0.0025 | 1.94  |
| Y15-25-2     | 3.33 | 0.88 | 0.19 | 0.97 | 0.14  | 0.85  | 0.25 | 0.78 | 0.11 | 0.79  | 0.096 | 20.141 | 0.0000 | 0.91  |
| Y15-25-3     | 6.69 | 2.90 | 0.35 | 3.36 | 0.59  | 3.72  | 0.66 | 1.55 | 0.20 | 1.21  | 0.20  | 20.509 | 0.011  | 1.63  |

|            |       |        |        |       |        |       |        |       |        |       |        |        |        |      |
|------------|-------|--------|--------|-------|--------|-------|--------|-------|--------|-------|--------|--------|--------|------|
| Y15-25-4   | 9.17  | 3.45   | 0.29   | 4.28  | 0.85   | 4.57  | 0.81   | 1.68  | 0.18   | 1.04  | 0.13   | 23.928 | 0.051  | 2.61 |
| Y15-25-5   | 10.2  | 3.88   | 0.49   | 4.78  | 0.88   | 5.00  | 0.87   | 2.11  | 0.25   | 1.43  | 0.20   | 19.946 | 0.015  | 2.48 |
| Y15-25-6   | 6.21  | 1.65   | 0.50   | 1.80  | 0.36   | 2.15  | 0.50   | 1.32  | 0.20   | 1.48  | 0.20   | 30.901 | 0.0045 | 1.37 |
| Y15-25-7   | 3.78  | 0.81   | 0.17   | 0.60  | 0.12   | 0.69  | 0.17   | 0.39  | 0.057  | 0.52  | 0.067  | 33.36  | 0.019  | 0.65 |
| Y15-25-8   | 53.9  | 7.64   | 1.09   | 4.88  | 0.79   | 4.79  | 1.00   | 2.81  | 0.41   | 2.55  | 0.44   | 60.08  | 0.014  | 1.79 |
| Y265-5-1   | 11.1  | 3.43   | 0.32   | 3.33  | 0.70   | 4.14  | 0.78   | 2.10  | 0.27   | 1.49  | 0.18   | 12.308 | 10.8   | 16.0 |
| Y265-5-2   | 7.57  | 2.55   | 0.22   | 2.08  | 0.55   | 3.40  | 0.70   | 1.62  | 0.22   | 1.25  | 0.13   | 9.468  | 4.20   | 12.1 |
| Y265-5-3   | 8.89  | 2.77   | 0.29   | 2.64  | 0.57   | 4.06  | 0.77   | 1.86  | 0.25   | 1.46  | 0.19   | 11.37  | 5.99   | 15.3 |
| Y265-5-4   | 5.38  | 2.09   | 0.22   | 2.04  | 0.45   | 2.67  | 0.52   | 1.09  | 0.15   | 1.13  | 0.11   | 9.279  | 3.34   | 10.2 |
| Y265-5-5   | 14.7  | 5.05   | 0.58   | 4.62  | 1.07   | 6.93  | 1.25   | 3.08  | 0.42   | 2.39  | 0.26   | 22.16  | 10.3   | 30.7 |
| Y265-5-6   | 9.16  | 3.07   | 0.36   | 3.05  | 0.62   | 4.00  | 0.81   | 1.80  | 0.23   | 1.47  | 0.18   | 17.53  | 7.87   | 23.6 |
| Y265-5-7   | 3.27  | 1.21   | 0.10   | 1.16  | 0.25   | 1.33  | 0.27   | 0.56  | 0.14   | 0.71  | 0.077  | 6.525  | 1.83   | 6.07 |
| 64-14-46-1 | 4.83  | 1.37   | 0.11   | 2.33  | 0.48   | 3.20  | 0.65   | 1.75  | 0.33   | 1.86  | 0.27   | 15.533 | 0.75   | 3.06 |
| 64-14-46-2 | 9.18  | 3.75   | 0.096  | 4.96  | 1.37   | 10.1  | 2.27   | 7.20  | 1.03   | 7.38  | 0.95   | 21.733 | 4.73   | 9.30 |
| 64-14-46-3 | 6.04  | 1.80   | 0.062  | 2.02  | 0.46   | 3.52  | 0.86   | 2.29  | 0.32   | 2.09  | 0.28   | 4.786  | 2.38   | 0.65 |
| 64-14-46-4 | 8.39  | 2.81   | 0.14   | 3.48  | 0.85   | 6.38  | 1.46   | 4.26  | 0.70   | 4.11  | 0.62   | 30.37  | 2.02   | 1.67 |
| 64-14-52-1 | 11.5  | 3.84   | 0.086  | 3.21  | 0.57   | 3.67  | 0.70   | 2.19  | 0.32   | 2.37  | 0.35   | 6.41   | 1.05   | 4.37 |
| 64-14-52-2 | 2.61  | 1.26   | 0.0088 | 1.93  | 0.33   | 2.00  | 0.42   | 1.08  | 0.17   | 1.08  | 0.20   | 1.23   | 1.39   | 0.78 |
| 64-14-52-3 | 16.3  | 4.63   | 0.19   | 4.76  | 1.02   | 6.97  | 1.60   | 4.46  | 0.66   | 5.10  | 0.60   | 51.338 | 8.73   | 4.59 |
| 64-14-52-4 | 10.6  | 3.68   | 0.14   | 4.49  | 1.15   | 7.45  | 1.60   | 4.80  | 0.64   | 4.75  | 0.69   | 73.45  | 4.72   | 7.23 |
| Y15-4-1    | 0.36  | 0.080  | 0.0000 | 0.17  | 0.044  | 0.41  | 0.11   | 0.35  | 0.060  | 0.34  | 0.039  | 3.6334 | 0.023  | 23.3 |
| Y15-4-2    | 0.016 | 0.093  | 0.0085 | 0.11  | 0.044  | 0.30  | 0.071  | 0.15  | 0.053  | 0.24  | 0.042  | 3.0249 | 0.020  | 17.5 |
| Y15-4-4    | 0.015 | 0.018  | 0.0000 | 0.035 | 0.024  | 0.10  | 0.027  | 0.093 | 0.023  | 0.20  | 0.022  | 2.291  | 0.0034 | 6.91 |
| Y15-4-5    | 1.30  | 0.27   | 0.044  | 0.63  | 0.11   | 1.15  | 0.28   | 0.85  | 0.11   | 0.92  | 0.16   | 3.348  | 0.27   | 32.0 |
| Y15-4-6    | 0.030 | 0.0000 | 0.0000 | 0.034 | 0.0096 | 0.052 | 0.0100 | 0.054 | 0.015  | 0.035 | 0.013  | 1.8318 | 0.0067 | 8.16 |
| Y15-16-1   | 0.080 | 0.0000 | 0.0000 | 0.072 | 0.0082 | 0.088 | 0.014  | 0.080 | 0.0053 | 0.049 | 0.0028 | 2.306  | 0.018  | 8.01 |

|              |       |        |        |        |        |       |        |       |        |       |        |        |        |       |
|--------------|-------|--------|--------|--------|--------|-------|--------|-------|--------|-------|--------|--------|--------|-------|
| Y15-16-2     | 0.049 | 0.057  | 0.0000 | 0.055  | 0.017  | 0.045 | 0.012  | 0.041 | 0.016  | 0.075 | 0.011  | 1.708  | 0.043  | 7.18  |
| Y15-16-3     | 0.065 | 0.057  | 0.0000 | 0.055  | 0.0049 | 0.11  | 0.023  | 0.049 | 0.0000 | 0.062 | 0.0021 | 1.067  | 0.061  | 15.2  |
| Y15-16-4     | 0.050 | 0.0000 | 0.0000 | 0.062  | 0.0095 | 0.050 | 0.013  | 0.056 | 0.012  | 0.11  | 0.0064 | 2.065  | 0.098  | 9.62  |
| Y15-16-5     | 0.018 | 0.27   | 0.0000 | 0.041  | 0.0093 | 0.062 | 0.016  | 0.037 | 0.0030 | 0.096 | 0.013  | 2.1096 | 0.024  | 8.61  |
| Y15-23-1     | 0.039 | 0.046  | 0.0000 | 0.044  | 0.0067 | 0.047 | 0.018  | 0.13  | 0.013  | 0.026 | 0.014  | 2.706  | 0.044  | 10.4  |
| Y15-23-2     | 0.036 | 0.0000 | 0.0057 | 0.0000 | 0.013  | 0.14  | 0.026  | 0.074 | 0.0030 | 0.028 | 0.022  | 1.783  | 0.031  | 30.5  |
| Y15-23-3     | 0.085 | 0.025  | 0.0000 | 0.048  | 0.018  | 0.15  | 0.031  | 0.076 | 0.025  | 0.15  | 0.019  | 3.446  | 0.028  | 15.1  |
| Y15-23-4     | 0.079 | 0.031  | 0.0048 | 0.045  | 0.014  | 0.055 | 0.036  | 0.10  | 0.0066 | 0.13  | 0.023  | 4.9380 | 0.012  | 24.7  |
| Y15-23-5     | 0.088 | 0.044  | 0.0005 | 0.057  | 0.020  | 0.14  | 0.036  | 0.097 | 0.0063 | 0.059 | 0.022  | 4.5172 | 0.011  | 47.7  |
| Y265-1-1     | 0.29  | 0.074  | 0.0000 | 0.096  | 0.0036 | 0.12  | 0.011  | 0.011 | 0.014  | 0.049 | 0.0075 | 0.430  | 0.038  | 63.7  |
| Y265-1-2     | 0.29  | 0.0000 | 0.011  | 0.084  | 0.025  | 0.051 | 0.017  | 0.038 | 0.0031 | 0.043 | 0.0066 | 0.3181 | 0.025  | 48.5  |
| Y265-1-3     | 0.15  | 0.053  | 0.0000 | 0.034  | 0.010  | 0.094 | 0.013  | 0.038 | 0.010  | 0.058 | 0.0054 | 0.273  | 0.057  | 40.6  |
| Y265-1-4     | 0.33  | 0.090  | 0.0048 | 0.092  | 0.018  | 0.067 | 0.016  | 0.039 | 0.0076 | 0.024 | 0.0082 | 0.2153 | 0.20   | 77.3  |
| Y265-1-5     | 0.17  | 0.020  | 0.0000 | 0.071  | 0.017  | 0.058 | 0.0089 | 0.042 | 0.0000 | 0.026 | 0.0059 | 0.2515 | 0.0036 | 95.5  |
| Y265-1-6     | 0.59  | 0.15   | 0.016  | 0.17   | 0.012  | 0.12  | 0.033  | 0.14  | 0.011  | 0.048 | 0.035  | 0.4971 | 0.026  | 167   |
| ZK61-14-67-1 | 3.43  | 0.732  | 0.0775 | 1.136  | 0.1980 | 1.48  | 0.374  | 1.247 | 0.192  | 1.182 | 0.1939 | 8.498  | 28.830 | 901.1 |
| ZK61-14-67-2 | 0.53  | 0.1501 | 0.023  | 0.259  | 0.044  | 0.311 | 0.121  | 0.267 | 0.0342 | 0.254 | 0.0393 | 4.5676 | 6.043  | 296.7 |
| ZK61-14-67-3 | 3.31  | 0.883  | 0.0748 | 0.960  | 0.239  | 1.520 | 0.387  | 1.183 | 0.177  | 1.189 | 0.1970 | 10.396 | 24.201 | 981.0 |
| ZK61-14-67-4 | 2.58  | 0.455  | 0.0615 | 0.859  | 0.138  | 1.336 | 0.311  | 0.923 | 0.1633 | 1.093 | 0.1905 | 7.9404 | 19.35  | 854.3 |
| ZK61-14-68-1 | 0.84  | 0.186  | 0.0446 | 0.308  | 0.044  | 0.253 | 0.0694 | 0.201 | 0.0305 | 0.236 | 0.0406 | 8.9619 | 6.0834 | 329.7 |
| ZK61-14-68-2 | 1.81  | 0.32   | 0.040  | 0.27   | 0.076  | 0.60  | 0.168  | 0.48  | 0.076  | 0.628 | 0.118  | 4.5852 | 12.931 | 525   |
| ZK61-14-68-3 | 0.79  | 0.198  | 0.0408 | 0.252  | 0.071  | 0.687 | 0.169  | 0.518 | 0.0742 | 0.545 | 0.0940 | 7.3243 | 6.54   | 261.4 |
| ZK61-14-68-4 | 0.98  | 0.242  | 0.0250 | 0.398  | 0.077  | 0.577 | 0.1335 | 0.518 | 0.0643 | 0.606 | 0.1291 | 4.3669 | 8.5314 | 345.6 |
| Z-250-33-1   | 0.18  | 0.038  | 0.0184 | 0.017  | 0.0256 | 0.11  | 0.041  | 0.122 | 0.013  | 0.177 | 0.0319 | 7.979  | 0.518  | 73.5  |
| Z-250-33-2   | 0.48  | 0.1841 | 0.013  | 0.187  | 0.042  | 0.314 | 0.079  | 0.254 | 0.0414 | 0.276 | 0.0568 | 8.4144 | 3.180  | 111.7 |
| Z-250-33-3   | 0.22  | 0.019  | 0.0148 | 0.141  | 0.024  | 0.166 | 0.023  | 0.125 | 0.022  | 0.278 | 0.0188 | 1.765  | 2.607  | 51.0  |

|            |      |       |        |       |       |       |       |       |       |       |        |         |        |       |
|------------|------|-------|--------|-------|-------|-------|-------|-------|-------|-------|--------|---------|--------|-------|
| Z-250-15-1 | 1.23 | 0.447 | 0.0552 | 0.351 | 0.123 | 0.870 | 0.225 | 0.666 | 0.151 | 1.101 | 0.1346 | 135.073 | 15.494 | 137.7 |
| Z-250-15-2 | 0.99 | 0.156 | 0.0339 | 0.311 | 0.106 | 0.777 | 0.214 | 0.642 | 0.110 | 0.911 | 0.1531 | 121.415 | 5.111  | 58.3  |

---
